# Supplementary material for: Conformational propensities and dynamics of a βγ-crystallin, an intrinsically disordered protein
Source: Royal Society of Chemistry journal article supplement (doi:10.1039/c3cp53558d), 2014-01-01
Supplement: c3cp53558d1.pdf [file c3cp53558d1.pdf]

**Table S1.** Content of various secondary structural elements of the individual clusters. The number of residues having a given type of secondary structural unit out of total 91 residues.

|                 | <b>2KP5</b> | <b>1</b> | <b>2</b> | <b>3</b> | <b>4</b> | <b>R2</b> | <b>R3</b> | <b>R4</b> | <b>R5</b> | <b>R6</b> | <b>R7</b> | <b>R8</b> |
|-----------------|-------------|----------|----------|----------|----------|-----------|-----------|-----------|-----------|-----------|-----------|-----------|
| $\beta$ -Sheet  | 34          | 34       | 28       | 26       | 32       | 10        | 15        | 7         | 15        | 12        | 15        | 21        |
| Bridge          | 1           | 1        | 1        | 3        | 2        | 0         | 1         | 1         | 1         | 1         | 2         | 2         |
| $\alpha$ -Helix | 7           | 6        | 12       | 15       | 6        | 14        | 18        | 23        | 7         | 14        | 20        | 5         |
| Turn            | 27          | 28       | 28       | 20       | 29       | 36        | 32        | 32        | 41        | 29        | 28        | 41        |
| $3_{10}$ -helix | 0           | 2        | 2        | 2        | 2        | 3         | 3         | 5         | 4         | 3         | 3         | 5         |
| Coil            | 22          | 20       | 21       | 25       | 20       | 28        | 22        | 23        | 23        | 32        | 23        | 17        |

**Table S2.** The computed radius ( $C_r$ ) and radius of gyration ( $R_g$ ) of holo-Hahellin and the REMD clusters (1 to 4 and R2 to R8) in Å.

|       | 2KP5 | 1        | 2        | 3        | 4        | R2        | R3       | R4       | R5       | R6       | R7       | R8       |
|-------|------|----------|----------|----------|----------|-----------|----------|----------|----------|----------|----------|----------|
| $C_r$ | 16.8 | 17.6±0.7 | 18.3±0.8 | 18.4±0.6 | 17.8±0.7 | 19.6.±0.7 | 19.4±0.9 | 18.5±0.8 | 19.6±0.6 | 18.9±0.4 | 19.6±0.8 | 18.7±0.4 |
| $R_g$ | 12.5 | 12.8±0.2 | 13.1±0.3 | 13.4±0.1 | 13.0±0.2 | 13.7.±0.3 | 13.2±0.2 | 13.7±0.2 | 13.3±0.2 | 13.1±0.3 | 14.0±0.3 | 13.0±0.1 |

|            |            |             |            |            |    |
|------------|------------|-------------|------------|------------|----|
| GEKTVKLYED | THFKGYSVEL | PVG DYNLSSL | ISRGALNDDL | SSARVPSGLR | 50 |
| LEVFQHNNFK | GVRDFYTSDA | AELSRDNDAS  | SVRVSKMETT | N          | 91 |

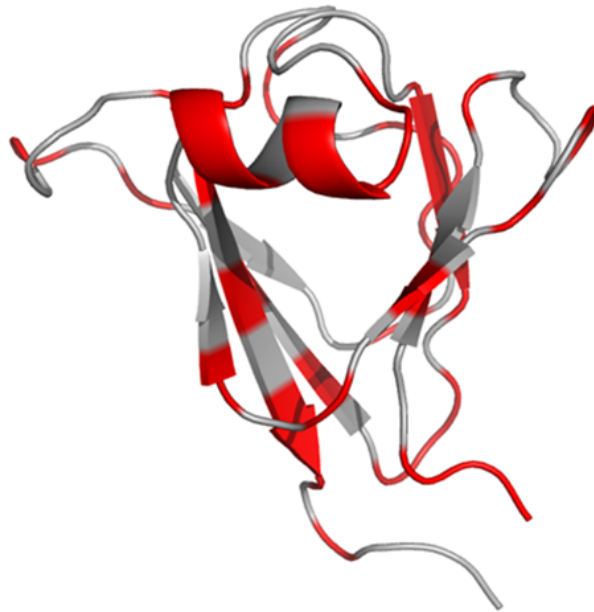

**Figure S1.** The NMR derived structure of holo-Hahellin highlighting the disorder promoting residues (shown in red). The primary sequence is shown on top of the panel with disorder promoting residues shown again in red.

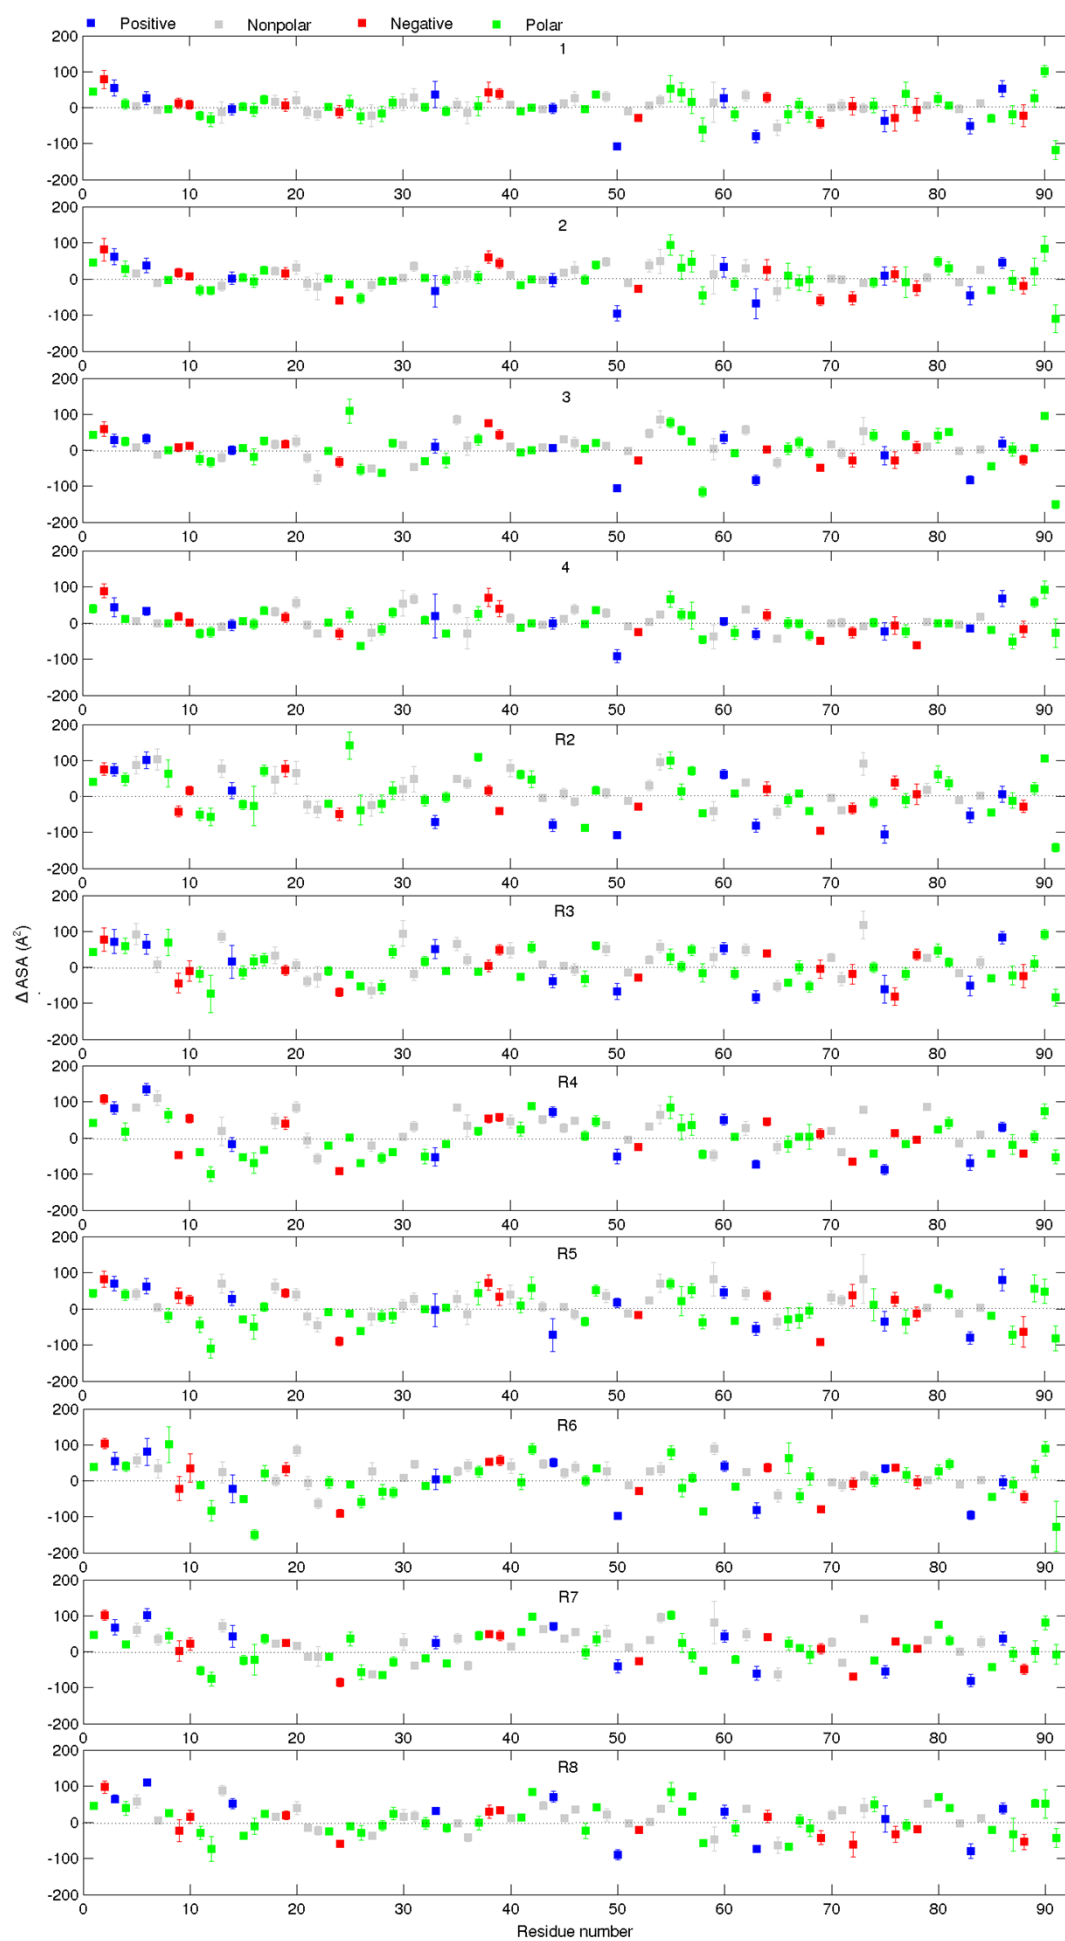

**Figure S2.** The change in residue-wise solvent accessible surface area ( $\Delta$ ASA) for each of the eleven clusters (see main text). The negative value indicates that the residue in holo-Hahellin is more exposed, while positive values indicate the opposite and zero values indicate that cluster member and holo-Hahellin have similar ASA. The standard deviation seen in  $\Delta$ ASA for individual cluster members is indicated with an error bar.

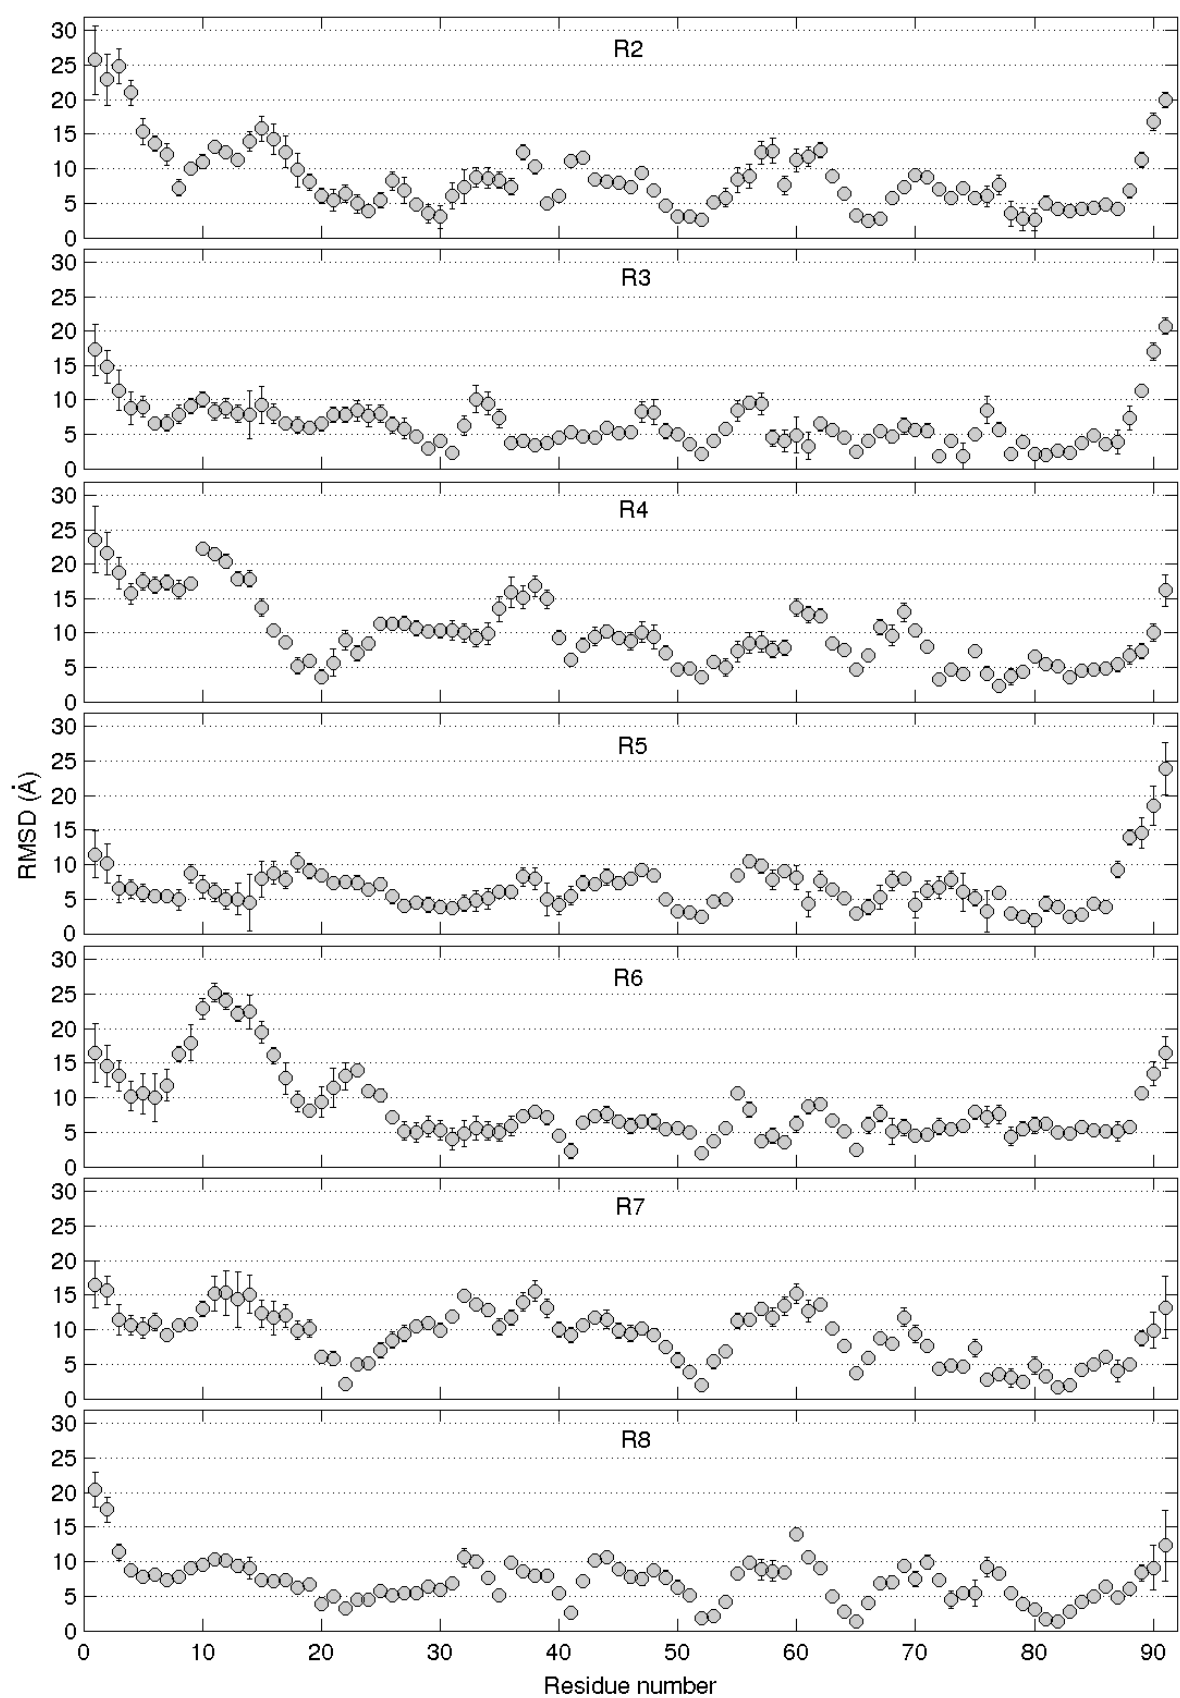

**Figure S3.** Residue wise RMSD values w.r.t. the holo-Hahellin for the far-native clusters (R2 to R8), which show large structural deviation all along the polypeptide sequence.

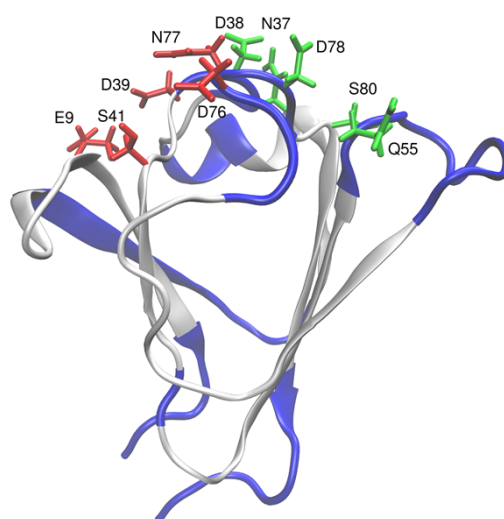

**Figure S4.** Residues showing higher values of RMSD ( $> 4 \text{ \AA}$ ) were mapped on to the NMR derived holo-Hahellin structure and were shown in blue. The calcium binding residues of the N- and C-terminal Greek key motives are indicated in red and green stick models, respectively.
